# Supplementary material for: Synthesis of hydroxide-enriched cerium-doped oxy-sulfide catalyst for visible light-assisted reduction of Cr(vi)
Source: Royal Society of Chemistry journal article supplement (doi:10.1039/d0nj04628k), 2020-11-16
Supplement: d0nj04628k1.pdf [file d0nj04628k1.pdf]

## Supplementary Material

### Synthesis of Hydroxide Enriched Cerium Doped Oxy-Sulfide Catalyst for Visible Light-Assisted Reduction of Cr(VI)

Misganaw Alemu Zeleke<sup>a,b</sup>, Dong-Hau Kuo<sup>b,\*</sup>

<sup>a</sup> Department of Materials Science and Engineering, Bahir Dar University, P.O. Box 79,  
Ethiopia

<sup>b</sup> Department of Materials Science and Engineering, National Taiwan University of  
Science and Technology, No.43, Sec. 4, Keelung Road, Taipei 10607, Taiwan

\*Corresponding Author: E-mail: [dhkuo@mail.ntust.edu.tw](mailto:dhkuo@mail.ntust.edu.tw), Fax: +011-886-2-27303291.

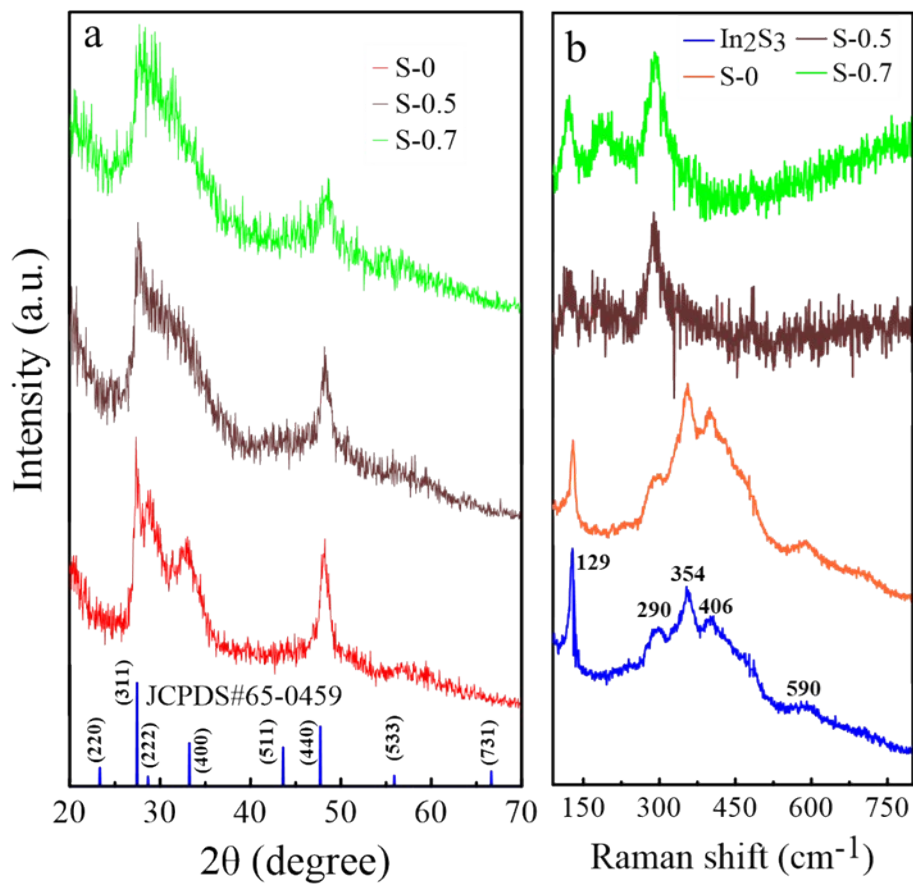

Fig.S1 (a) XRD patterns and (b) Raman spectra of host nanoflower S-0 and hydroxide enriched nanoflower-like S-0.5 and S-0.7 catalysts.

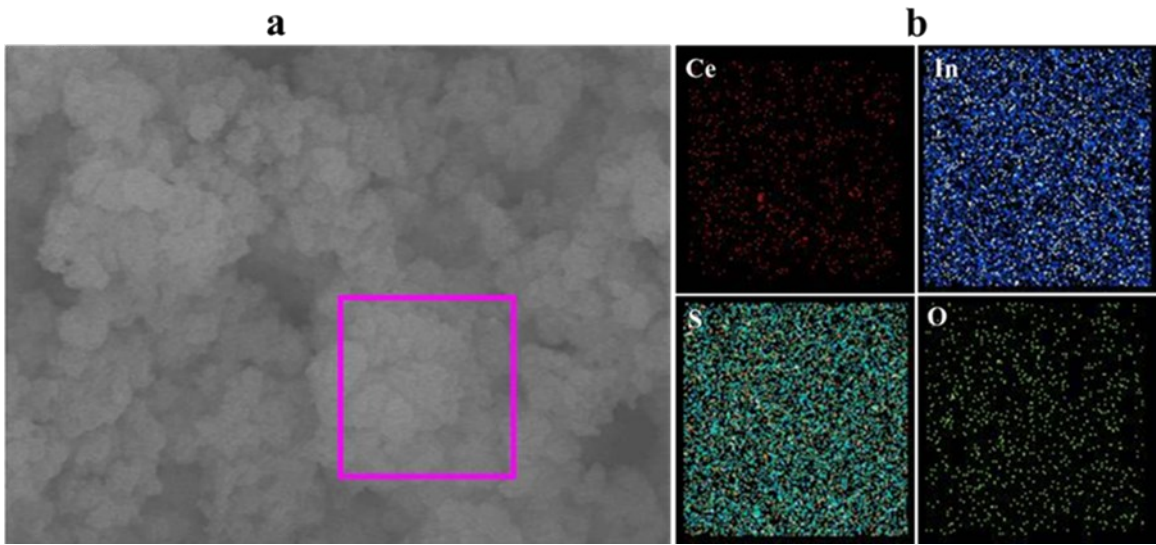

Fig. S2 (a) FE-SEM image and (b) elemental mapping of the hydroxide enriched nanoflower-like S-0.6 catalyst.

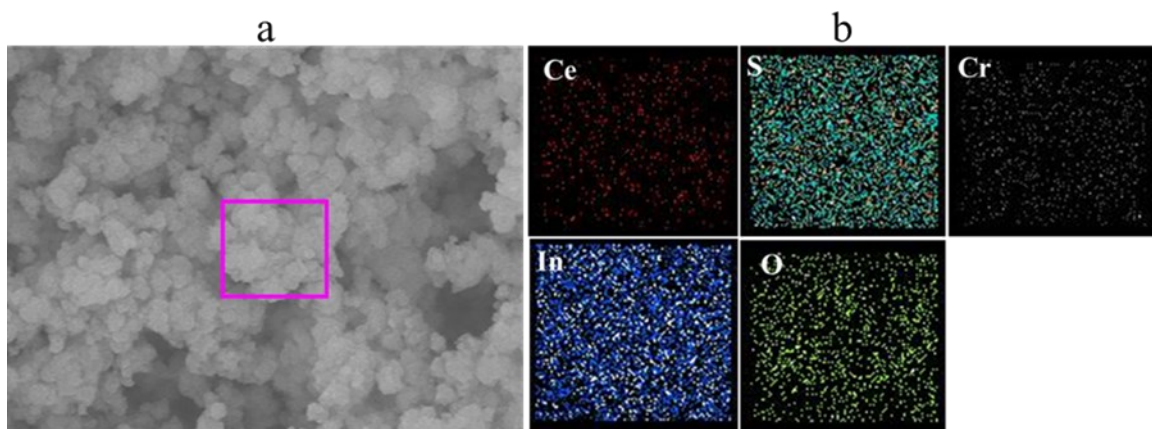

Fig. S3 (a) FE-SEM image and (b) elemental mapping of the reused hydroxide enriched nanoflower-like S-0.6 catalyst.

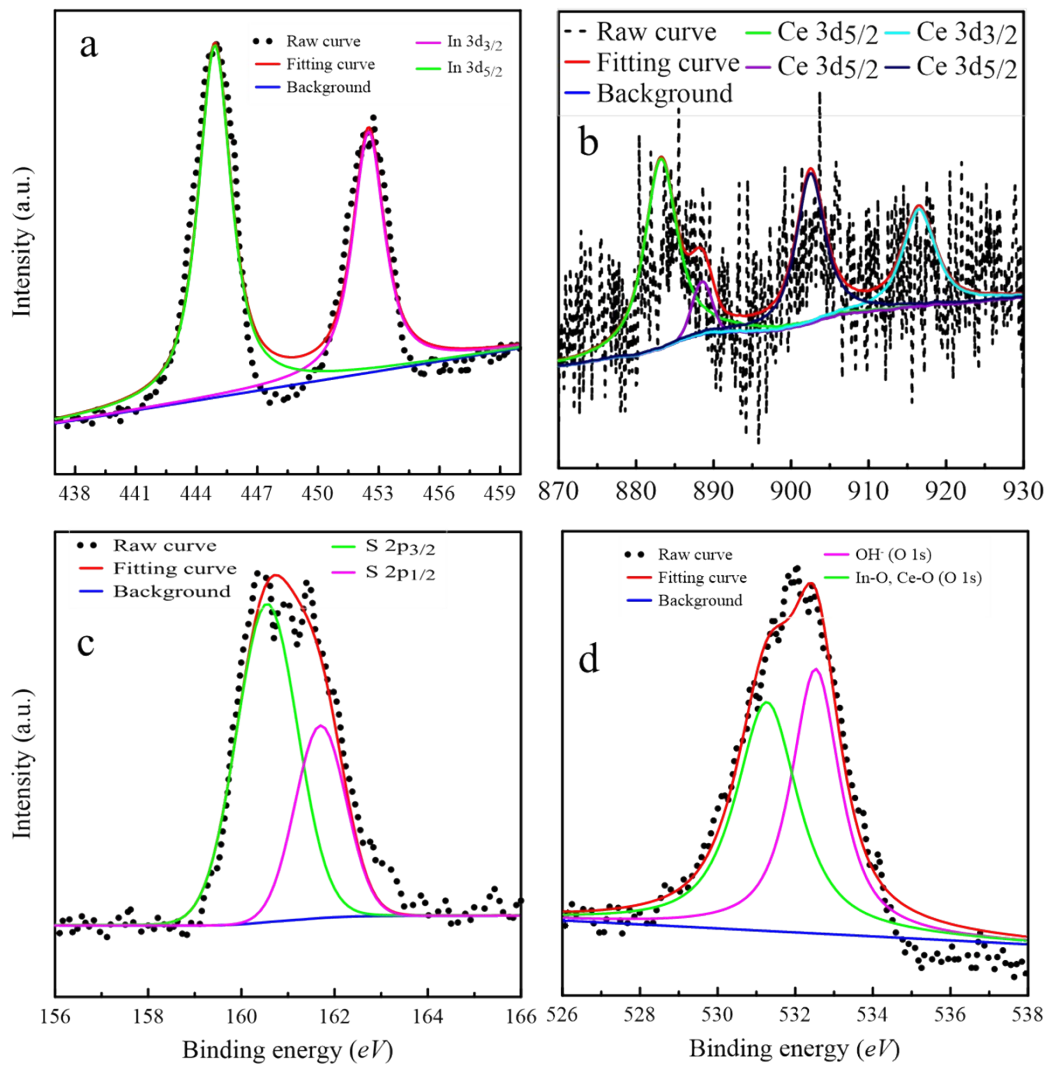

Fig. S4 High-resolution XPS spectra of (a) In-3d, (b) Ce-3d, and (c) S-2p, and (d) O-1s of recycled hydroxide enriched nanoflower-like S-0.6 catalyst.
